# 1           **Structural complementarity facilitates E7820-mediated degradation of** 2                                           **RBM39 by DCAF15**

3 Tyler Faust<sup>1,2,†</sup>, Hojong Yoon<sup>1,2,†</sup>, Radosław P. Nowak<sup>1,2</sup>, Katherine A. Donovan<sup>1,2</sup>, Zhengnian  
4 Li<sup>1,2</sup>, Quan Cai<sup>1,2</sup>, Nicholas A. Eleuteri<sup>1,2</sup>, Tinghu Zhang<sup>1,2</sup>, Nathanael S. Gray<sup>1,2</sup>, Eric S.  
5 Fischer<sup>1,2,\*</sup>

6  
7   <sup>1</sup> Department of Cancer Biology, Dana-Farber Cancer Institute, Boston, MA 02215, USA.

8   <sup>2</sup> Department of Biological Chemistry and Molecular Pharmacology, Harvard Medical School,  
9 Boston, MA 02115, USA.

10   † These authors contributed equally to this work.

11   \* Correspondence to: [eric\\_fischer@dfci.harvard.edu](mailto:eric_fischer@dfci.harvard.edu)

12  
13   **Abstract:** The investigational drugs E7820, indisulam and tasisulam (aryl-sulfonamides)  
14 promote the degradation of the splicing factor RBM39 in a proteasome-dependent mechanism.  
15 While the activity critically depends on the Cullin RING ligase substrate receptor DCAF15, the  
16 molecular details remain elusive. Here we present the cryo-EM structure of the DDB1-DCAF15-  
17 DDA1 core ligase complex bound to RBM39 and E7820 at 4.4 Å resolution, together with  
18 crystal structures of engineered subcomplexes. We show that DCAF15 adopts a novel fold  
19 stabilized by DDA1, and that extensive protein-protein contacts between the ligase and substrate  
20 mitigate low affinity interactions between aryl-sulfonamides and DCAF15. Our data  
21 demonstrates how aryl-sulfonamides *neo*-functionalize a shallow, non-conserved pocket on  
22 DCAF15 to selectively bind and degrade RBM39 and the closely related splicing factor RBM23

23 without the requirement for a high affinity ligand, which has broad implications for the *de novo*  
24 discovery of molecular glue degraders.  
25

26           Pharmacologic intervention for many newly discovered disease targets — such as  
27 transcription factors, multi-protein complexes or scaffold proteins — is challenging because they  
28 lack an enzymatic function to facilitate the design of classical low molecular weight inhibitors.  
29 An alternative approach, small molecule-induced protein degradation, circumvents the need for  
30 an enzymatic function in the target protein<sup>1</sup>. The therapeutic potential of targeted protein  
31 degradation has been demonstrated by the success of thalidomide-related anti-cancer drugs  
32 (often referred to as immunomodulatory drugs, or IMiDs). IMiDs bind CRBN, the substrate  
33 receptor of the CUL4-RBX1-DDB1-CRBN (CRL4<sup>CRBN</sup>) E3 ubiquitin ligase<sup>2-5</sup>, and generate a  
34 novel binding surface to recruit and ubiquitinate *neo*-substrates<sup>6-10</sup>. Such molecular glues present  
35 an opportunity to target virtually any protein for degradation, even in the absence of a defined  
36 binding pocket. However, IMiDs have nanomolar affinity for CRBN, and the almost invariable  
37 conservation of the drug binding pocket and *neo*-substrate interaction surface suggests that  
38 IMiDs hijack an evolutionarily conserved mechanism, akin to what was found for the plant  
39 hormones auxin and jasmonate<sup>11,12</sup>. Whether molecular glue degraders critically depend on such  
40 high affinity interactions, and if these interactions can be achieved for ligases that have not  
41 evolved for ligand binding, is of critical importance for the further development of this new  
42 therapeutic modality.

43           Recently, the aryl-sulfonamides E7820, indisulam and tasisulam were shown to induce  
44 targeted degradation of the splicing factor RBM39 through recruitment of the E3 ubiquitin ligase  
45 CUL4-RBX1-DDB1-DCAF15 (CRL4<sup>DCAF15</sup>)<sup>13,14</sup>, which suggested a molecular glue mechanism.  
46 Indisulam was initially discovered in a phenotypic screen and found to be cytotoxic to specific  
47 cancer cell lines and in pre-clinical models<sup>15</sup>, while tasisulam and E7820 are derivatives around  
48 the sulfonamide core. E7820, indisulam and tasisulam were investigated in multiple phase I and

49 II clinical trials involving advanced-stage solid tumors with a modest number of clinical  
50 responses, potentially due to an insufficient understanding of the mechanism of action and lack  
51 of informed patient stratification<sup>14,16</sup>. However, novel genetic dependencies in acute myeloid  
52 leukemia (AML) suggest a potential for clinical development<sup>16</sup>, and a recent phase II study  
53 encourages development with appropriate biomarkers<sup>17</sup>. Moreover, the aryl-sulfonamides appear  
54 to promote binding of DCAF15 to the RNA recognition motif (RRM) of RBM39, which  
55 suggests that derivatives of the aryl-sulfonamides may be used to target other RRM-containing  
56 proteins<sup>9,10</sup>. However, a detailed picture of the mechanism by which sulfonamides engage  
57 CRL4<sup>DCAF15</sup> to promote turnover of the *neo*-substrate RBM39 is critically required to further  
58 leverage this new class of drugs for the targeting of RBM39, more generally of RRM containing  
59 proteins, and for the broad application of molecular glue degraders. We therefore set out to  
60 dissect the molecular basis of RBM39 recruitment to CRL4<sup>DCAF15</sup>.

61

## 62 **Results**

### 63 **RBM39 recruitment to CRL4<sup>DCAF15</sup> depends on sulfonamides**

64 A recent study identified resistance mutations in cells treated with cytotoxic doses of  
65 indisulam that arise in the second RRM domain of RBM39 (RBM39<sub>RRM2</sub>)<sup>13,14</sup>. These mutations  
66 abrogate the interaction with CRL4<sup>DCAF15</sup>, which suggested that ligase binding is mediated by the  
67 RRM2 domain. To better characterize the interaction of RBM39 with DCAF15, we measured the  
68 affinity of recombinant DDB1-DCAF15 for RBM39<sub>RRM2</sub> in the presence of E7820 using time-  
69 resolved fluorescence resonance energy transfer (TR-FRET). In the presence of E7820,  
70 indisulam or tasisulam at 50  $\mu$ M, DDB1-DCAF15 and RBM39<sub>RRM2</sub> associated with  $K_D^{\text{app}}$  of 2.0  
71  $\mu$ M, 2.1  $\mu$ M, and 3.5  $\mu$ M, respectively (**Fig. 1a, Supplementary Fig. 1a**). In contrast,

72 RBM39<sub>RRM2</sub> did not show measurable affinity with DDB1-DCAF15, even at 10  $\mu$ M, in the  
73 absence of compound (**Supplementary Fig. 1b**). E7820 interacts with DCAF15 ( $K_D^{\text{app}}$  of 3.8  
74  $\mu$ M), but not with RBM39 (**Fig. 1b, Supplementary Fig. 1c**). Based on TR-FRET competition  
75 assays (**Supplementary Fig. 1d,e**), E7820 binds to DCAF15 with a  $K_i$  of 2.9  $\mu$ M, while the  $K_i$   
76 for indisulam and tasisulam is  $> 50$   $\mu$ M (**Fig. 1c**), which is analogous to the  $EC_{50}$  values when  
77 each compound is titrated into the RBM39<sub>RRM2</sub> TR-FRET recruitment assay (**Supplementary**  
78 **Fig. 1f**). Notably, RBM39 was potently degraded in cells at 500 nM E7820 (**Supplementary**  
79 **Fig. 1g**), which contrasts the relatively weak affinity of E7820 for DCAF15.

80

### 81 **Cryo-EM structure of DCAF15 complex bound to RBM39<sub>RRM2</sub>**

82 All initial attempts to crystallize full-length human DCAF15 complexes were  
83 unsuccessful, so we focused our efforts on cryo-electron microscopy (cryo-EM). Initial class  
84 averages of DDB1-DCAF15-E7820-RBM39<sub>RRM2</sub>, indicated that DCAF15 and the BPB domain  
85 of DDB1 were flexible with respect to the core of DDB1 (**Supplementary Fig. 2a-d**). We  
86 therefore took advantage of a DDB1 construct lacking the BPB domain, DDB1 $\Delta$ B<sup>18</sup>, and  
87 chemical crosslinking (**Supplementary Fig. 2e**). DDB1 $\Delta$ B-DCAF15-DDA1-RBM39<sub>RRM2</sub> were  
88 co-expressed in the presence of E7820, and after extensive optimization (see **Online Methods**),  
89 we collected a dataset that led to a 3D reconstruction of the 180 kDa complex at an overall  
90 resolution of  $\sim 4.4$   $\text{\AA}$  (**Fig. 1d-f, Supplementary Fig. 2e-h, and Supplementary Fig. 3**).

91 DDB1 $\Delta$ B was readily placed into the density using the crystal structure (pdb: 5fqd, chain  
92 A) as a model, and a search using the balbes-molrep pipeline<sup>19</sup> located the RRM domain  
93 corresponding to RBM39<sub>RRM2</sub> (**Fig. 1e**) but did not identify homologous structures in the  
94 putative full-length DCAF15 density. The map allowed for segmentation of the density and

95 unambiguous assignment of density to DCAF15 and DDA1 (**Fig. 1d,e**). While the resolution was  
96 not sufficient to build an atomic model (**Supplementary Fig. 3a**), we were able to build an  
97 approximate poly-alanine trace of DCAF15 and DDA1 using additional information from cross-  
98 linking mass spectrometry (**Supplementary Table 1**), mutations placed in putative helices  
99 (**Supplementary Fig. 4a**), and secondary structure prediction. RBM39<sub>RRM2</sub> packs against an  $\alpha$ -  
100 helix of DCAF15, and the Gly268 of RBM39, previously found to be a dominant position of  
101 indisulam resistance mutations<sup>13,14</sup>, packs against the DCAF15 helix and would not tolerate a  
102 sidechain-bearing residue (**Fig. 1e**). At the interface between RBM39<sub>RRM2</sub> and DCAF15 was  
103 density that did not represent amino acid side chains and was tentatively assigned as E7820 (**Fig.**  
104 **1e**). While the proximity of RBM39 residue Met265, which when mutated to leucine abrogates  
105 binding<sup>14</sup>, supports this assignment, the resolution of the cryo-EM map was insufficient for an  
106 unambiguous interpretation of ligand binding.

107         We therefore engineered a minimal complex suitable for crystallographic studies.  
108 Limited proteolysis experiments revealed that similarly sized fragments of DCAF15 were stably  
109 associated with DDB1 after gel filtration (**Supplementary Fig. 4b**). This result indicated both  
110 that DCAF15 contained an exposed, likely disordered, region available for proteolytic cleavage  
111 and that distinct segments of DCAF15 could independently bind DDB1. Disorder prediction  
112 further demonstrated a highly unstructured region of DCAF15 (**Supplementary Fig. 4c**), which  
113 led us to design constructs of the N-terminal (residues 30-264) and C-terminal (residues 383-  
114 600) fragments of human DCAF15 (DCAF15<sub>split</sub>). Co-expression of these fragments with  
115 DDB1 $\Delta$ B led to the formation of a soluble complex, that exhibited equivalent binding affinity for  
116 RBM39 to full-length human DCAF15 (**Supplementary Fig. 4d,e**).

117

## 118 **Crystal structure of DCAF15 complex bound to RBM39<sub>RRM2</sub>**

119 Crystals were obtained for a DDB1 $\Delta$ B-DCAF15<sub>split</sub>-DDA1-E7820-RBM39<sub>RRM2</sub> complex,  
120 and the structure was determined by molecular replacement with a final model refined to 2.9 Å  
121 resolution (**Fig. 2a, Supplementary Table 2**). To validate that the engineered DCAF15<sub>split</sub>  
122 resembles the full-length DCAF15 structure, we docked the X-ray model into the cryo-EM map<sup>20</sup>  
123 and found that the crystal structure accounts for all of the full-length DCAF15 density as well as  
124 density for E7820 (**Supplementary Fig. 3e,f**).

125 DCAF15<sub>split</sub> consists of two predominantly  $\beta$ -sheet containing domains (**Fig. 2b,c**), the N-  
126 terminal domain (NTD, residues 30-264) and the C-terminal domain (CTD, residues 383-600).  
127 DCAF15 binds to DDB1 with a helix-loop-helix motif<sup>21</sup>, forming contacts with the two DDB1  $\beta$ -  
128 propeller domains BPA and BPC and resembling the helix-loop-helix motif in CSA and DDB2  
129 (**Supplementary Fig. 4a, Supplementary Fig. 5a,b**). DCAF15, unlike most other DDB1 and  
130 CUL4-associated factors (DCAFs), does not contain a canonical WD40  $\beta$ -propeller fold and  
131 lacks homology to any other CRL substrate receptor<sup>22</sup>. Following the helix-loop-helix motif, the  
132 DCAF15 NTD and CTD are interwoven into five stacks of antiparallel  $\beta$ -sheets in an open  
133 solenoid arrangement, with  $\beta$ -sheets 1, 3, and 4 sharing strands from both the NTD and CTD.  
134 While  $\beta$ -sheets 2 and 3 have some resemblance to WD40 repeats,  $\beta$ -sheets 4 and 5 have unique  
135 features (**Fig. 2b,c**). Preceding  $\beta$ -sheet 4 is a short helix ( $\alpha$ 4) angled  $\sim 45^\circ$  away from the sheet,  
136 before looping into  $\beta$ -strand 10 and 11. The terminal strands 12 and 14 of  $\beta$ -sheet 4 are  
137 contributed by the DCAF15 CTD, creating an extended interface between the two domains.  $\beta$ -  
138 sheet 5 is stabilized by two  $\alpha$ -helices (DCAF15  $\alpha$ 5 and  $\alpha$ 6), and  $\alpha$ 7 helix sits on the opposite  
139 side forming the major interactions with RBM39<sub>RRM2</sub>. The overall shape of DCAF15 is clamp-  
140 like and embraces RBM39<sub>RRM2</sub> on the concave surface.

141 The small protein DDA1 is commonly associated with CRL4 complexes<sup>23,24</sup>, and  
142 knockout of DDA1 was found to reduce the indisulam-mediated degradation of RBM39<sup>14</sup>. In the  
143 crystal and cryo-EM structures, DDA1 binds to the top of the DDB1 BPA before running down  
144 the backside of the propeller (**Fig. 1d, Fig. 3a**). At the bottom of the DDB1 BPA, DDA1  
145 intercalates a  $\beta$ -strand in the DDB1 propeller, using several highly conserved residues (**Fig. 3b**).  
146 Adjacent to this  $\beta$ -strand is an  $\alpha$ -helix that buries multiple DDA1 hydrophobic residues (Leu55,  
147 Leu56, Leu59, and Trp63) in DCAF15 (**Fig. 3b**). Given that DDA1 is a core CRL4 component  
148 associating with many different substrate receptors<sup>23,25</sup>, the extent of the DCAF15 interactions  
149 are unexpected and suggest that the DDA1 helix represents a plastic binding module for other  
150 DCAFs. We measured the affinity of E7820 to recombinant DDB1-DCAF15 and DDB1-  
151 DCAF15-DDA1, as well as the ability of these complexes to bind to RBM39<sub>RRM2</sub>. While the  
152 affinity of E7820 to DCAF15 was not altered by the presence of DDA1, the apparent affinity to  
153 RBM39<sub>RRM2</sub> was strengthened  $\sim$  3-fold with an  $K_D^{\text{app}}$  of 0.62  $\mu\text{M}$  (**Fig. 3c-e**), which explains  
154 why genetic loss of DDA impairs induced RBM39 degradation<sup>14</sup>.

155

### 156 **Aryl-sulfonamides interact primarily with DCAF15**

157 E7820 binds in a shallow pocket at the interface between DCAF15-NTD and DCAF15-  
158 CTD situated in a weakly conserved surface groove proximal to DDB1 (**Fig. 4, Supplementary**  
159 **Fig. 5c-e**). While the placement of E7820 is firmly supported by the electron density  
160 (**Supplementary Fig. 6a,b**), we further validated the arrangement of the ligand through  
161 anomalous diffraction and a UV-crosslinking probe (**Supplementary Fig. 6c-h**). E7820 is  
162 sandwiched in a hydrophobic pocket between DCAF15 and RBM39<sub>RRM2</sub>, with the indole facing  
163 Met265 of RBM39. Notably, the RBM39 Met265Leu mutation was found to confer resistance to



164 E7820-mediated degradation<sup>14</sup>, which is in accordance with the sulfur- $\pi$  interaction observed in  
165 the structure. The two sulfonyl oxygens of E7820 form hydrogen bonds with the backbone amide  
166 nitrogens of DCAF15 Ala234 and Phe235, while the indole nitrogen and sulfonamide nitrogen  
167 form extensive water-mediated hydrogen bonds with the sidechain oxygens of RBM39 Thr262  
168 and Asp264. Additional hydrogen bonds between the indole nitrogen and backbone carbonyl  
169 oxygen of DCAF15 Phe231, together form the core pharmacophore. The C4 methyl of E7820  
170 forms hydrophobic interactions with Val477 and Val556 of DCAF15 (**Fig. 4a,c**), and swapping  
171 the methyl for a hydrogen, as in indisulam or desmethyl-E7820, results in a significant loss of  
172 DCAF15 binding (**Supplementary Fig. 6i**). The phenyl ring forms a T-shaped  $\pi$ - $\pi$  interaction  
173 with DCAF15 Phe235 and otherwise is situated in a spacious pocket allowing for structural  
174 diversity as observed in indisulam and tasisulam.

175 Finally, we obtained structures of the related but structurally distinct analogs indisulam  
176 and tasisulam to 2.9 Å resolution, respectively (**Fig. 4d, Supplementary Fig. 6j,k**). We find that  
177 indisulam and tasisulam bind DCAF15 in an overall configuration similar to E7820, maintaining  
178 the backbone hydrogen bonds from the sulfonyl groups to DCAF15 Ala234 and Phe235 and the  
179 water mediated hydrogen bonds. However, the methyl to hydrogen substitution at C4 in  
180 indisulam limits the hydrophobic interactions with DCAF15 Val477 and Val556, while tasisulam  
181 lacks the indole NH hydrogen bond to the backbone carbonyl of DCAF15 Phe231  
182 (**Supplementary Fig. 6j,k**). These differences in indisulam and tasisulam help to explain their  
183 significant loss in affinity for DCAF15, while maintaining the ability to recruit RBM39 for  
184 degradation (**Fig. 1a,c**).

185

186 **DCAF15-RBM39 forms extensive protein-protein contacts**

187           The weak affinity of aryl-sulfonamides for DCAF15 (**Supplementary Fig. 1c,f**) suggests  
188   that protein-protein contacts between DCAF15 and RBM39<sub>RRM2</sub> stabilize the interaction.  
189   RBM39<sub>RRM2</sub> presents itself as a canonical RRM fold, comprised of a four-stranded anti-parallel  
190    $\beta$ -sheet ( $\beta$ 1 -  $\beta$ 4) stacked on two  $\alpha$ -helices ( $\alpha$ 1 and  $\alpha$ 2) (**Fig. 2a**) and interacts with DCAF15  
191   predominantly via the two  $\alpha$ -helices. The RBM39<sub>RRM2</sub>  $\alpha$ 1 helix docks into the surface groove on  
192   DCAF15 that also harbors the E7820 binding site and forms contacts with DCAF15 and E7820.  
193   The RBM39<sub>RRM2</sub>-DCAF15 interface comprises  $\sim 1,150 \text{ \AA}^2$  and spans the DCAF15 NTD and  
194   CTD (**Fig. 5a**). The binding groove is not conserved (**Supplementary Fig. 5e**) and is dominated  
195   by extensive hydrophobic interactions with the DCAF15  $\alpha$ 7 helix in the CTD (**Fig. 5b**). As was  
196   observed in the cryo-EM structure (**Fig. 1e**), the tight packing of the interface would not allow a  
197   side chain-bearing residue at RBM39 Gly268, such that a Gly268Val mutation completely  
198   abrogates RBM39<sub>RRM2</sub> recruitment to DCAF15 (**Supplementary Fig. 6l**). The interface includes  
199   four salt bridges between DCAF15 Arg574, Arg178, Arg160, and Asp174 and RBM39 Asp264,  
200   Glu271, and Arg275 respectively, and side chain hydrogen bonds between DCAF15 Ser546 and  
201   RBM39 Gln310, respectively (**Fig. 5b**). An additional indisulam resistance mutation in RBM39,  
202   Glu271Gln<sup>14</sup>, is likely explained by a loss in the salt bridge interaction with DCAF15  
203   (**Supplementary Fig. 6m**). An extended network of backbone hydrogen bonds further stabilizes  
204   the DCAF15-RBM39 interface (**Supplementary Fig. 6n**).

205

### 206 **Aryl-sulfonamides selectively degrade of RBM39 and RBM23**

207           As many RRM domains are structurally highly similar and since RBM39 interacts with  
208   DCAF15 predominantly through two conserved  $\alpha$ -helices in its second RRM, we considered  
209   whether other RRM-containing proteins would be targeted by DCAF15 and E7820. To assess the

210 degradome of E7820, we performed unbiased mass spectrometry-based proteomics experiments  
211 and found only RBM23 to be degraded in addition to RBM39 out of ~ 11,000 proteins detected  
212 (**Fig. 5c**). Sequence analysis revealed that the second RRM domain of RBM23 (RBM23<sub>RRM2</sub>) is  
213 nearly identical to RBM39<sub>RRM2</sub>, with 100% sequence identity across all key residues that form  
214 contacts with DCAF15 and E7820 (**Fig. 5d**). Consequently, we found comparable binding  
215 affinity for RBM23<sub>RRM2</sub> to that observed for RBM39<sub>RRM2</sub> (**Fig. 5e**). Cullin-RING ligases of the  
216 CRL4 family tolerate a diverse set of substrate receptors but typically present their substrates in a  
217 canonical position<sup>21,26</sup>. When superimposed with a Cullin-RING ligase complex (pdb: 4a0k), a  
218 model of the full CRL4<sup>DCAF15</sup> ligase bound to RBM39 can be constructed. RBM39<sub>RRM2</sub> is bound  
219 to a face of DCAF15 that is not directly opposed to RBX1 (**Fig. 6a**), however the N- and C-  
220 termini of RBM39 are positioned towards RBX1, and could tolerate additional domains at both  
221 positions. Furthermore, in contrast to CRBN, the ligand and substrate pocket of DCAF15 is not  
222 conserved (**Fig. 6b**), suggesting that the topological and evolutionary constraints on developing  
223 molecular glue degraders are rather flexible.

224

## 225 **Discussion**

226 Small molecules that recruit *neo*-substrates to a ubiquitin ligase have the potential to  
227 overcome the need for distinct binding pockets on target proteins. Our structural and  
228 pharmacological analyses have uncovered that aryl-sulfonamides represent a new type of  
229 molecular glue degrader, as they act as interface binders with weak receptor affinity to promote  
230 RBM39 degradation by CRL4<sup>DCAF15</sup>. We find that DCAF15 adopts a structure not commonly  
231 found in CRL substrate receptors and engages the second RRM domain of RBM39 with an  
232 extended, non-conserved surface area, which is in contrast to other small molecule-mediated

233 CRL-substrate interactions such as auxin, jasmonate and IMiDs<sup>10-12,18,27</sup>. The total buried surface  
234 area of RBM39<sub>RRM2</sub>-DCAF15 is 1,150 Å<sup>2</sup>, which is larger than that of CRBN with *neo*-substrates  
235 (~600 Å<sup>2</sup>) and compensates for the weak affinity of these compounds for DCAF15 ( $K_i > 50 \mu\text{M}$   
236 for indisulam and tasisulam). While IMiDs target a beta-hairpin loop primarily through backbone  
237 interactions between ligand, ligase and *neo*-substrate, the interactions between RBM39<sub>RRM2</sub> and  
238 DCAF15 are more substantial and involve significant side-chain interactions that result in  
239 increased specificity compared to the relatively promiscuous zinc-finger recognition by the  
240 CRBN-IMiD complex<sup>9,10</sup>. The IMiD binding pocket is highly conserved, suggesting the  
241 existence of a natural ligand, while the pocket in DCAF15 is less conserved and implies that  
242 aryl-sulfonamides bind to an otherwise non-functional cavity. Together, the *neo*-  
243 functionalization of a relatively shallow, non-conserved pocket, and the weak affinity for  
244 DCAF15 suggests that molecular glues can be obtained for ligases that are not endogenously  
245 regulated by small molecules.

246 Induced protein degradation through PROTACs is another commonly used strategy for  
247 protein degradation and novel E3 ligase ligands are highly sought after for the development of  
248 such probes. The position of the binding pocket in DCAF15, which exposes the phenyl moiety to  
249 the solvent proximal to DDB1, together with the relatively weak affinity of aryl-sulfonamides for  
250 DCAF15, suggests that these ligands may not be ideally suited for the development of such  
251 degraders. While we demonstrate that a linker can be attached to the phenyl ring without  
252 significant loss of affinity, the exit vector is pointing towards DDB1 and away from RBX1,  
253 which will likely result in steric clashes with target proteins and sub-optimal positioning of  
254 recruited target proteins to be ubiquitinated.

255 Our work identifies DDA1 as an integral component of the CRL4<sup>DCAF15</sup> ubiquitin ligase,  
256 and we demonstrate how DDA1 serves as an additional scaffolding subunit of a functional CRL4  
257 complex. In the case of CRL4<sup>DCAF15</sup>, DDA1 binds to the top of the BPA subunit of DDB1 and  
258 forms extensive contacts with the backside of DDB1 before connecting to DCAF15 through an  
259  $\alpha$ -helix enforcing the overall structure of the complex. The presence of DDA1 causes increased  
260 E7820-dependent binding of DCAF15 to RBM39<sup>RRM2</sup>, which is in accordance with DDA1  
261 knockout resulting in partial rescue of RBM39 degradation in cells<sup>14</sup>. It is conceivable that  
262 DDA1 will serve as a scaffolding protein in other CRL4 complexes, but more work is needed to  
263 understand the role of DDA1 in CRL4 regulation and its potential interplay with other CRL  
264 regulators such as the COP9 signalosome (CSN) and CAND1.

265 In summary, our work significantly expands our understanding of general principles of  
266 molecular glue degraders. We show how binders targeted to interfaces with significant sidechain  
267 interactions between receptor and substrate result in very selective agents. This is in contrast to  
268 IMiDs, which bind a conserved pocket in CRBN and only contribute minor backbone  
269 interactions to the interface, resulting in highly poly-targeted molecules<sup>9,10</sup>. While close analogs  
270 of E7820 are unlikely to target a broad set of RRM domains, the structural complementarity  
271 between DCAF15 and the canonical RRM fold suggests that novel chemical matter to target  
272 other RRM containing proteins to CRL4<sup>DCAF15</sup> will likely be obtainable. Importantly, our  
273 structural characterization further supports the concept that compatible interfaces are more likely  
274 to occur between unrelated proteins than we may have anticipated. As such, prospective screens  
275 for molecular glues would ideally be preceded by selecting ligases with complementary  
276 interfaces for the intended target, similar to what we have previously utilized for PROTAC  
277 design<sup>28</sup>.

278 **Acknowledgements:** We acknowledge Dr. Hyuk-Soo Seo for help with ITC experiments. Cryo-  
279 EM data was collected at the UMass cryo-EM facility, with help from Dr. KangKang Song and  
280 Dr. Chen Xu. Financial support for this work was provided by NIH grant NCI R01CA214608  
281 (grant to E.S.F.) and F32 fellowship 1F32CA232772-01 (T.F.). E.S.F. is a Damon Runyon-  
282 Rachleff Innovator supported in part by the Damon Runyon Cancer Research Foundation (DRR-  
283 50–18). This work is based upon research conducted at the Northeastern Collaborative Access  
284 Team beamlines, which are funded by NIH NIGMS (P41 GM103403) and NIH-ORIP HEI grant  
285 (S10 RR029205). This research used resources of the Advanced Photon Source, a US  
286 Department of Energy (DOE) Office of Science User Facility operated by Argonne National  
287 Laboratory under Contract No. DE-AC02-06CH11357. This research was, in part, supported by  
288 the National Cancer Institute’s National Cryo-EM Facility at the Frederick National Laboratory  
289 for Cancer Research.

290 **Author contributions:** T.F., H.Y., N.S.G., R.P.N., and E.S.F. initiated the project and designed  
291 experiments. T.F., H.Y. and R.P.N. conducted protein purification, T.F. performed crystallization  
292 and cryo-EM experiments. H.Y. developed and performed biochemical assays. R.P.N., T.F. and  
293 E.S.F. collected and processed X-ray diffraction data. N.A.E. and K.A.D. performed the mass  
294 spectrometry experiments. H.Y., Z.L., and Q.C. synthesized small molecules with input from  
295 T.Z. N.S.G. and E.S.F. supervised the project. T.F., H.Y., and E.S.F. wrote the manuscript, with  
296 input from all authors.

297 **Competing interests:** E.S.F. is a founder and/or member of the scientific advisory board (SAB),  
298 and equity holder of C4 Therapeutics and Civetta Therapeutics and a consultant to Novartis,  
299 AbbVie and Pfizer. The Fischer lab receives research funding from Novartis, Deerfield and  
300 Astellas. N.S.G. is a founder, SAB member and equity holder in Gatekeeper, Syros, Petra, C4,

301 B2S and Soltego. The Gray lab receives or has received research funding from Novartis, Takeda,  
302 Astellas, Taiho, Janssen, Kinogen, Voronoi, Her2llc, Deerfield and Sanofi. N.S.G., E.S.F, H.Y.,  
303 Q.C., T.Z., T.F., R.P.N and K.A.D. are inventors on a patent application (PCT/US2018/065701  
304 and PCT/US2019/014919), submitted by the Dana-Farber Cancer Institute.

305

## 306 **References**

- 307 1 Salami, J. & Crews, C. M. Waste disposal-An attractive strategy for cancer therapy.  
308 *Science* **355**, 1163-1167, doi:10.1126/science.aam7340 (2017).
- 309 2 Chamberlain, P. P. *et al.* Structure of the human Cereblon-DDB1-lenalidomide complex  
310 reveals basis for responsiveness to thalidomide analogs. *Nat Struct Mol Biol* **21**, 803-809  
311 (2014).
- 312 3 Fischer, E. S., Park, E., Eck, M. J. & Thoma, N. H. SPLINTS: small-molecule protein  
313 ligand interface stabilizers. *Curr Opin Struct Biol* **37**, 115-122,  
314 doi:10.1016/j.sbi.2016.01.004 (2016).
- 315 4 Fischer, E. S. *et al.* Structure of the DDB1-CRBN E3 ubiquitin ligase in complex with  
316 thalidomide. *Nature* **512**, 49-53 (2014).
- 317 5 Ito, T. *et al.* Identification of a primary target of thalidomide teratogenicity. *Science (New*  
318 *York, NY)* **327**, 1345-1350 (2010).
- 319 6 Lu, G. *et al.* The myeloma drug lenalidomide promotes the cereblon-dependent  
320 destruction of Ikaros proteins. *Science* **343**, 305-309 (2014).
- 321 7 Kronke, J. *et al.* Lenalidomide causes selective degradation of IKZF1 and IKZF3 in  
322 multiple myeloma cells. *Science* **343**, 301-305 (2014).
- 323 8 Gandhi, A. K. *et al.* Immunomodulatory agents lenalidomide and pomalidomide co-  
324 stimulate T cells by inducing degradation of T cell repressors Ikaros and Aiolos via  
325 modulation of the E3 ubiquitin ligase complex CRL4(CRBN.). *British journal of*  
326 *haematology* **164**, 811-821 (2014).
- 327 9 Donovan, K. A. *et al.* Thalidomide promotes degradation of SALL4, a transcription  
328 factor implicated in Duane Radial Ray syndrome. *Elife* **7**, doi:10.7554/eLife.38430  
329 (2018).



- 330 10 Sievers, Q. L. *et al.* Defining the human C2H2 zinc finger degrome targeted by  
331 thalidomide analogs through CRBN. *Science* **362**, doi:10.1126/science.aat0572 (2018).
- 332 11 Sheard, L. B. *et al.* Jasmonate perception by inositol-phosphate-potentiated COI1-JAZ  
333 co-receptor. *Nature* **468**, 400-405, doi:10.1038/nature09430 (2010).
- 334 12 Tan, X. *et al.* Mechanism of auxin perception by the TIR1 ubiquitin ligase. *Nature* **446**,  
335 640-645, doi:10.1038/nature05731 (2007).
- 336 13 Uehara, T. *et al.* Selective degradation of splicing factor CAPERalpha by anticancer  
337 sulfonamides. *Nat Chem Biol* **13**, 675-680, doi:10.1038/nchembio.2363 (2017).
- 338 14 Han, T. *et al.* Anticancer sulfonamides target splicing by inducing RBM39 degradation  
339 via recruitment to DCAF15. *Science* **356**, doi:10.1126/science.aal3755 (2017).
- 340 15 Ozawa, Y. *et al.* E7070, a novel sulphonamide agent with potent antitumour activity in  
341 vitro and in vivo. *Eur J Cancer* **37**, 2275-2282 (2001).
- 342 16 Wang, E. *et al.* Targeting an RNA-Binding Protein Network in Acute Myeloid Leukemia.  
343 *Cancer Cell* **35**, 369-384 e367, doi:10.1016/j.ccell.2019.01.010 (2019).
- 344 17 Assi, R. *et al.* Final results of a phase 2, open-label study of indisulam, idarubicin, and  
345 cytarabine in patients with relapsed or refractory acute myeloid leukemia and high-risk  
346 myelodysplastic syndrome. *Cancer* **124**, 2758-2765, doi:10.1002/ncr.31398 (2018).
- 347 18 Petzold, G., Fischer, E. S. & Thoma, N. H. Structural basis of lenalidomide-induced  
348 CK1alpha degradation by the CRL4 ubiquitin ligase. *Nature* **532**, 127-130 (2016).
- 349 19 Brown, A. *et al.* Tools for macromolecular model building and refinement into electron  
350 cryo-microscopy reconstructions. *Acta Crystallogr D Biol Crystallogr* **71**, 136-153,  
351 doi:10.1107/S1399004714021683 (2015).
- 352 20 Adams, P. D. *et al.* PHENIX: a comprehensive Python-based system for macromolecular  
353 structure solution. *Acta Crystallographica Section D-Biological Crystallography* **66**, 213-  
354 221, doi:10.1107/S0907444909052925 (2010).
- 355 21 Fischer, E. S. *et al.* The molecular basis of CRL4DDB2/CSA ubiquitin ligase  
356 architecture, targeting, and activation. *Cell* **147**, 1024-1039,  
357 doi:10.1016/j.cell.2011.10.035 (2011).
- 358 22 Zimmerman, E. S., Schulman, B. A. & Zheng, N. Structural assembly of cullin-RING  
359 ubiquitin ligase complexes. *Current opinion in structural biology*,  
360 doi:10.1016/j.sbi.2010.08.010 (2010).



- 361 23 Jin, J., Arias, E. E., Chen, J., Harper, J. W. & Walter, J. C. A family of diverse Cul4-  
362 Ddb1-interacting proteins includes Cdt2, which is required for S phase destruction of the  
363 replication factor Cdt1. *Mol Cell* **23**, 709-721, doi:S1097-2765(06)00570-3 [pii]  
364 10.1016/j.molcel.2006.08.010 (2006).
- 365 24 Shabek, N. *et al.* Structural insights into DDA1 function as a core component of the  
366 CRL4-DDB1 ubiquitin ligase. *Cell Discov* **4**, 67, doi:10.1038/s41421-018-0064-8 (2018).
- 367 25 Olma, M. H. *et al.* An interaction network of the mammalian COP9 signalosome  
368 identifies Dda1 as a core subunit of multiple Cul4-based E3 ligases. *Journal of Cell*  
369 *Science* **122**, 1035-1044, doi:10.1242/jcs.043539 (2009).
- 370 26 Cavadini, S. *et al.* Cullin-RING ubiquitin E3 ligase regulation by the COP9 signalosome.  
371 *Nature* **531**, 598-603 (2016).
- 372 27 Matyskiela, M. E. *et al.* A novel cereblon modulator recruits GSPT1 to the CRL4(CRBN)  
373 ubiquitin ligase. *Nature* **535**, 252-257 (2016).
- 374 28 Nowak, R. P. *et al.* Plasticity in binding confers selectivity in ligand-induced protein  
375 degradation. *Nat Chem Biol*, doi:10.1038/s41589-018-0055-y (2018).
- 376
- 377

378 **Fig. 1 | Cryo-EM structure of the DDB1 $\Delta$ B-DCAF15-DDA1 complex bound to E7820 and**  
379 **RBM39<sub>RRM2</sub>.** **a**, TR-FRET. Titration of BodipyFL-RBM39<sub>RRM2</sub> to DDB1 $\Delta$ B-DCAF15<sub>biotin</sub> in the  
380 presence of E7820 (**1**,  $K_D^{\text{app}} = 2.0 \mu\text{M}$ ), indisulam (**2**,  $K_D^{\text{app}} = 2.1 \mu\text{M}$ ), or tasisulam (**3**,  $K_D^{\text{app}} =$   
381  $3.5 \mu\text{M}$ ) at  $50 \mu\text{M}$ . **b**, TR-FRET. Titration of BodipyFL-E7820 (**4**) probe to DDB1 $\Delta$ B-  
382 DCAF15<sub>biotin</sub> or RBM39<sub>RRM2</sub>-biotin. Compound binding is only observed for DDB1 $\Delta$ B-  
383 DCAF15<sub>biotin</sub> ( $K_D^{\text{app}} = 3.8 \mu\text{M}$ ). **c**, Competitive titration of BodipyFL-E7820 (**4**) with aryl  
384 sulfonamides in TR-FRET assay. DDB1 $\Delta$ B-DCAF15<sub>biotin</sub> is at  $200 \text{ nM}$ , BodipyFL-E7820 (**4**) is  
385 at  $5 \mu\text{M}$ , and aryl-sulfonamides are at  $0.002\text{-}100 \mu\text{M}$ . TR-FRET data in **a-c** are plotted as means  
386  $\pm$  s.d. from three independent replicates ( $n = 3$ ). **d**,  $4.4 \text{ \AA}$  cryo-EM map of the DDB1 $\Delta$ B-  
387 DCAF15-DDA1-E7820-RBM39<sub>RRM2</sub> complex segmented to indicate DDA1 (cyan), DCAF15  
388 (green), RBM39<sub>RRM2</sub> (magenta), DDB1-BPC (orange), DDB1-BPA (red), and DDB1-CTD  
389 (grey). **e**, Cryo-EM map shown with the fitted and refined model. (Right), close-up of the region  
390 of the RBM39-DCAF15 interface, with the resistance mutation site G268V indicated in yellow  
391 and the putative E7820 density outlined in dotted lines. **f**, Domain representation of the proteins  
392 present in the complex. Regions omitted from the constructs are indicated by hatched lines.  
393  
394 **Fig. 2 | Crystal structure of the DDB1 $\Delta$ B-DCAF15<sub>split</sub>-DDA1-E7820-RBM39<sub>RRM2</sub> complex.**  
395 **a**, (Left) Cartoon representation of the DDB1 $\Delta$ B-DCAF15-DDA1-E7820-RBM39<sub>RRM2</sub> complex.  
396 DDA1 (cyan), DCAF15-NTD (blue), DCAF15-CTD (green), RBM39<sub>RRM2</sub> (magenta), DDB1-  
397 BPC (orange), DDB1-BPA (red), and DDB1-CTD (grey). E7820 is shown as spheres. (Right) A  
398 different view of the complex, shown in transparent surface representation. **b**, Cartoon  
399 representation of DCAF15 indicating secondary structure elements and colored in blue and  
400 green, for the DCAF15-NTD and DCAF15-CTD, respectively. DCAF15 alpha helices and beta

401 strands are numbered from the N- to C-terminus, which are shown as colored circles for both the  
402 NTD and CTD of DCAF15. **c**, Cartoon view of DCAF15, highlighting the five stacked  $\beta$ -sheets.  
403 Helices from the NTD and CTD are colored in grey.

404

405 **Fig. 3 | DDA1 stabilizes the CRL4<sup>DCAF15</sup> complex and facilitates RBM39 recruitment. a,**

406 Cartoon representation of the DDB1 $\Delta$ B-DCAF15<sub>split</sub>-E7820-RBM39 complex with DDA1  
407 highlighted as a cyan surface representation. DDA1 binds at the top of DDB1-BPA, winds down  
408 the back side of the propeller, and ends in a helix buried in DCAF15. **b**, DDB1 and DCAF15 are  
409 shown as a grey and green surface, respectively, and DDA1 is represented as a cartoon colored  
410 according to the conservation scores as calculated in ConSurf<sup>36</sup>. The top 3 bins of conservation in  
411 ConSurf (high conservation) are colored in red, orange, and yellow, respectively, while the  
412 bottom 6 bins (average and variable conservation, shown as “low”) are colored in gray to  
413 highlight the most conserved surfaces. **c**, TR-FRET. Titration of BodipyFL-RBM39<sub>RRM2</sub> to  
414 DDB1 $\Delta$ B-DCAF15<sub>biotin</sub> ( $K_D^{\text{app}} = 1.9 \mu\text{M}$ ) or DDB1 $\Delta$ B-DCAF15<sub>biotin</sub>-DDA1 ( $K_D^{\text{app}} = 0.62 \mu\text{M}$ ) in  
415 the presence of E7820 (50  $\mu\text{M}$ ), demonstrating enhanced recruitment of RBM39<sub>RRM2</sub> to the  
416 DDA1-containing complex. **d**, TR-FRET. Titration of E7820 to DDB1 $\Delta$ B-DCAF15<sub>biotin</sub> ( $\text{EC}_{50} =$   
417  $0.74 \mu\text{M}$ ) or DDB1 $\Delta$ B-DCAF15<sub>biotin</sub>-DDA1 and BodipyFL-RBM39<sub>RRM2</sub> ( $\text{EC}_{50} = 0.33 \mu\text{M}$ ). **e**,  
418 Titration of BodipyFL-E7820 to DDB1 $\Delta$ B-DCAF15<sub>biotin</sub> ( $K_D^{\text{app}} = 3.8 \mu\text{M}$ ) or DDB1 $\Delta$ B-  
419 DCAF15<sub>biotin</sub>-DDA1 ( $K_D^{\text{app}} = 3.8 \mu\text{M}$ ). TR-FRET data in **c-e** are plotted as means  $\pm$  s.d. from  
420 three independent replicates ( $n = 3$ ).

421

422 **Fig. 4 | Aryl-sulfonamide binding to DCAF15. a,** Sketch of E7820 and its interactions with  
423 DCAF15 and RBM39. Water-mediated hydrogen bonds are highlighted in cyan. **b**, Chemical

424 structures of E7820 (**1**), indisulam (**2**), and tasisulam (**3**). **c**, E7820 interacts predominantly  
425 through the sulfonamide moiety and the indole moiety with residues in the DCAF15-NTD (blue).  
426 Additional hydrophobic interactions with the DCAF15-CTD (green), and sulfur- $\pi$  interaction as  
427 well as water (cyan)-mediated hydrogen bonds with RBM39 (magenta) stabilize E7820 in a  
428 shallow pocket. **d**, Surface representation of DCAF15 is shown in grey and E7820, indisulam  
429 and tasisulam are shown as stick representation in yellow, magenta and cyan, respectively.

430

431 **Fig. 5 | Inter-protein contacts between DCAF15 and RBM39.** **a**, Surface representation of  
432 DCAF15 and RBM39<sub>RRM2</sub> indicating the extensive interacting interface on DCAF15 and  
433 RBM39, shown in grey. E7820 is shown as a yellow stick representation. **b**, Side chain  
434 interactions between DCAF15, RBM39 and E7820. RBM39 buries a large hydrophobic surface  
435 on the DCAF15  $\alpha 7$  helix, in addition to four salt-bridges with DCAF15 on the opposing side of  
436 the binding interface. **c**, Scatter plot depicting identification of the novel E7820 substrate,  
437 RBM23, in Kelly cells. Kelly cells were treated with E7820 (10  $\mu$ M) for 5 hours, and protein  
438 abundance was analyzed using TMT quantification mass spectrometry (two-sided moderated t-  
439 test as implemented in limma,  $n = 3$  for dms0,  $n = 1$  for E7820). **d**, Alignment of the second  
440 RRM domain from RBM39 and RBM23. Residues in black are completely conserved, gray  
441 shading represents similar substitutions, and white indicates no conservation. Red circles above  
442 the alignment indicate the positions of resistance mutations in RBM39 for indisulam-dependent  
443 toxicity. **e**, TR-FRET. Titration of E7820 to DDB1 $\Delta$ B-DCAF15 in the presence of BodipyFL-  
444 RBM39<sub>RRM2-WT</sub> ( $EC_{50} = 0.74 \mu$ M), BodipyFL-RBM23<sub>RRM2-WT</sub> ( $EC_{50} = 1.0 \mu$ M). TR-FRET data  
445 in **e** are plotted as means  $\pm$  s.d. from three independent replicates ( $n = 3$ ).

446

447 **Fig. 6 | Topological and evolutionary constraints on E7820 activity. a,** A model of the  
448 CRL4<sup>DCAF15</sup> ligase bound to E7820 and RBM39<sub>RRM2</sub>. The N- and C-termini of RBM39<sub>RRM2</sub>  
449 (pink circles) are positioned near RBX1 in the ligase, while RBM39<sub>RRM2</sub> itself is bound on a  
450 non-proximal side face of DCAF15. The DCAF15<sub>split</sub> crystal structure was superimposed onto  
451 the DDB1-DDB2-CUL4A-RBX1 crystal structure (pdb: 4a0k). **b,** Evolutionary conservation of  
452 DCAF15 (top) and CRBN (bottom). The substrate receptors are represented as a surface, colored  
453 according to the conservation scores as calculated in ConSurf with the top 3 bins of conservation  
454 colored in red, orange, and yellow, respectively, and the bottom 6 bins colored in gray to  
455 highlight the most conserved surfaces<sup>36</sup>. DCAF15 is shown bound to E7820 (yellow) and the  $\alpha$ 1  
456 helix (residues 262-274) of RBM39<sub>RRM2</sub> (magenta), while CRBN is shown bound to  
457 lenalidomide (green) and the  $\beta$ -hairpin loop (residues 29-49) of CK1 $\alpha$  (cyan). Lenalidomide and  
458 CK1 $\alpha$  both bind in a highly conserved pocket of CRBN.

459

## 460 **Online Methods**

### 461 **Constructs and protein purification.**

462 The human genes for full-length DDB1, DDB1 $\Delta$ B (residues 396-705 replaced with  
463 GNGNSG linker), full-length DCAF15, DCAF15 NTD (30-264), DCAF15 CTD (383-600), full-  
464 length DDA1, RBM39<sub>RRM2</sub> (245-332), and RBM23<sub>RRM2</sub> (263-341) and the *Xenopus tropicalis*  
465 gene for full-length DCAF15 were cloned in pAC-derived vectors<sup>29</sup>. Baculovirus for protein  
466 expression (Invitrogen) was generated by transfection into *Spodoptera frugiperda* (Sf9) cells at a  
467 density of  $0.9 \times 10^6$  cells/mL grown in ESF 921 media (Expression Systems), followed by three  
468 rounds of infection in Sf9 cells to increase viral titer. Recombinant proteins were expressed as N-  
469 terminal His<sub>6</sub>, Strep II, Strep II Avi fusions in *Trichoplusia ni* High Five insect cells by infection

470 with high titer baculovirus. Briefly, Hi Five cells grown in Sf-900 II SFM media (Gibco) at a  
471 density of  $2.0 \times 10^6$  cells/mL were infected with baculovirus at 1.5% (v/v). After 40 hours of  
472 expression at 27° C, Hi Five cells were pelleted for 10 minutes at 3,500 x g. For purification of  
473 StrepII or His<sub>6</sub>-tagged proteins, pelleted cells were resuspended in buffer containing 50 mM  
474 tris(hydroxymethyl) aminomethane hydrochloride (Tris-HCl) pH 8.0, 200 mM NaCl, 2 mM tris  
475 (2-carboxyethyl)phosphine (TCEP), 1 mM phenylmethylsulfonyl fluoride (PMSF), and 1×  
476 protease inhibitor cocktail (Sigma) and lysed by sonication. Media and purification buffers  
477 contained 10-20 μM E7820, as needed. Following ultracentrifugation, the soluble fraction was  
478 passed over the appropriate affinity resin of Strep-Tactin XT Superflow (IBA) or Ni Sepharose 6  
479 Fast Flow affinity resin (GE Healthcare), eluted with wash buffer (50 mM Tris-HCl pH 8.0, 200  
480 mM NaCl, 1 mM TCEP) supplemented with 50 mM d-Biotin (IBA) or 100 mM imidazole  
481 (Fisher Chemical), respectively. The affinity-purified DCAF15 complexes used for structure  
482 determination were next applied to an ion exchange column (Poros 50HQ) and eluted in 50 mM  
483 Tris-HCl pH 8.5, 2 mM TCEP, and 20 μM E7820 by a linear salt gradient (from 50-800 mM  
484 NaCl). Peak fractions of DCAF15 complex from ion exchange chromatography were then  
485 subjected to size-exclusion chromatography on a Superdex 200 10/300 in 50 mM 4-(2-  
486 hydroxyethyl)-1-piperazineethanesulfonic acid (HEPES) pH 7.4 or pH 8.0, 200 mM NaCl and 2  
487 mM TCEP. Peak gel filtration fractions were pooled and concentrated and then either used  
488 directly in structural experiments or flash frozen in liquid nitrogen and stored at -80° C. Affinity-  
489 purified protein used in biochemical experiments was concentrated and subjected to size-  
490 exclusion chromatography as outlined above. The protein-containing fractions were concentrated  
491 using ultrafiltration (Millipore) and flash frozen in liquid nitrogen and stored at -80 °C.  
492

493 **Limited proteolysis and gel filtration**

494 The DDB1 $\Delta$ B-*X.t.* DCAF15 complex was diluted to 20  $\mu$ M in 25 mM HEPES pH 7.4,  
495 200 mM NaCl, and 1 mM TCEP. *Xenopus tropicalis* DCAF15 is closely related to *Homo sapiens*  
496 DCAF15, with 66% sequence identity overall and 76% sequence identity in the structured NTD  
497 and CTD regions, and was examined in parallel in initial biochemical experiments. A 200  $\mu$ M  
498 stock of chymotrypsin was diluted to 20  $\mu$ M with 1 mM HCl and 2 mM CaCl<sub>2</sub>, which was then  
499 added to the DDB1 $\Delta$ B-*X.t.* DCAF15 complex at a 400:1 ratio (50 nM chymotrypsin final  
500 concentration). The proteolysis reaction was carried out on ice for 45 minutes, centrifuged at  
501 15,000 rpm at 4 °C, and injected onto an EnRich 650 column for gel filtration.

502

503 **Biotinylation of DCAF15 and RBM39.**

504 Purified Strep II Avi-tagged human DCAF15 variants or RBM39<sub>RRM2</sub> were biotinylated  
505 *in vitro* at a concentration of 5-50  $\mu$ M by incubation with final concentrations of 2.5  $\mu$ M BirA  
506 enzyme and 0.2 mM D-Biotin in 50 mM HEPES pH 7.4, 200 mM NaCl, 10 mM MgCl<sub>2</sub>, 0.25  
507 mM TCEP and 20 mM ATP. The reaction was incubated for 1 h at room temperature and stored  
508 overnight at 4 °C. Biotinylated proteins were purified by gel filtration chromatography and flash  
509 frozen in liquid nitrogen and stored at -80 °C.

510

511 **BodipyFL-labeling of RBM39 and RBM23.**

512 Purified human RBM39<sub>RRM2</sub> or RBM23<sub>RRM2</sub> was incubated with DTT (8 mM) at 4 °C for  
513 1 h. DTT was removed using a S200 10/300 gel filtration column in a buffer containing 50 mM  
514 Tris pH 7.3 and 150 mM NaCl. BodipyFL-maleimide (Invitrogen) was dissolved in 100%  
515 DMSO and mixed with RBM39 or RBM23 to achieve 3-fold molar excess of BodipyFL-

516 maleimide. Labelling was carried out at room temperature for 3 h and stored overnight at 4 °C.  
517 Labelled RBM39 or RBM23 was purified on a S200 10/300 gel filtration column in 50 mM Tris  
518 pH 7.5, 150 mM NaCl, 0.25 mM TCEP, concentrated by ultrafiltration (Milipore), flash frozen in  
519 liquid nitrogen and stored at -80 °C.

520

### 521 **Time-resolved fluorescence resonance energy transfer (TR-FRET).**

522 Titrations of compounds to induce DCAF15-RBM39 or DCAF15-RBM23 complex were  
523 carried out by mixing 200 nM biotinylated Strep II Avi-tagged DCAF15, 200 nM BodipyFL-  
524 labeled RBM39 or RBM23 variants, and 2 nM terbium-coupled streptavidin (Invitrogen) in an  
525 assay buffer containing 50 mM Tris pH 8.0, 200 mM NaCl, 0.1% Pluronic F-68 solution  
526 (Sigma), and 0.5% BSA (w/v). Full-length human DCAF15 was used in all TR-FRET assays.  
527 After dispensing the assay mixture, increasing concentrations of compounds were dispensed in a  
528 384-well microplate (Corning, 4514) using a D300e Digital Dispenser (HP) normalized to 2%  
529 DMSO. Before TR-FRET measurements were conducted, the reactions were incubated for 15  
530 min at room temperature. After excitation of terbium fluorescence at 337 nm, emission at 490  
531 nm (terbium) and 520 nm (BodipyFL) were recorded with a 70 µs delay over 600 µs to reduce  
532 background fluorescence, and the reaction was followed over 60 cycles of each data point using  
533 a PHERAstar FS microplate reader (BMG Labtech). The TR-FRET signal of each data point was  
534 extracted by calculating the 520/490 nm ratio. The half-maximal effective concentration EC<sub>50</sub>  
535 values calculated using [Agonist] vs response (three parameters) equation in GraphPad Prism 7.  
536 Titrations of BodipyFL-RBM39 were carried out by mixing 400 nM biotinylated Strep II  
537 Avi-tagged DCAF15 variants, 100 µM compounds or equivalent volume of DMSO, and 4 nM  
538 terbium-coupled streptavidin in the same assay buffer. After dispensing the assay mixture,



539 increasing concentration of BodipyFL-RBM39 was added to the compound-bound DCAF15 in a  
540 1:1 volume ratio and incubated for 15 min at room temperature. The 520/490 nm ratios were  
541 plotted to calculate the  $K_d$  values estimated using One site-Specific binding equation in GraphPad  
542 Prism 7.

543 Titrations of BodipyFL-E7820 (**4**) were carried out by mixing 200 nM biotinylated Strep  
544 II Avi-tagged DCAF15 variants or equivalent volume of the assay buffer, 2 nM terbium-coupled  
545 streptavidin in the same assay buffer. After dispensing the assay mixture, increasing  
546 concentration of BodipyFL-E7820 (**4**) was dispensed in the 384-well plate using D300e  
547 normalized to 2% DMSO, and then incubated for 15 min at room temperature. The 520/490 nm  
548 ratios from the sample with DCAF15 was subtracted by the ratios from the sample without  
549 DCAF15, and the subtracted values were plotted to calculate the  $K_d$  values estimated using One  
550 site-Specific binding equation in GraphPad Prism 7. All TR-FRET results are plotted as means  $\pm$   
551 s.d. from three independent replicates ( $n = 3$ ) unless otherwise indicated.

552

### 553 **Crystallization**

554 Frozen aliquots of the Strep II Avi-DCAF15<sub>NTD</sub> (residues 30-264)-Strep II Avi-  
555 DCAF15<sub>CTD</sub> (residues 383-600)-His<sub>6</sub>-DDB1 $\Delta$ B-His<sub>6</sub>-DDA1-His<sub>6</sub>-RBM39<sub>RRM2</sub> complex were  
556 thawed, centrifuged for 10 minutes at 15,000 rpm at 4 °C, and injected onto a Superdex 200  
557 10/300 column equilibrated with 50 mM HEPES pH 8.0, 150 mM NaCl, 2 mM TCEP, and 20  
558  $\mu$ M E7820. All proteins used in crystallography are derived from human sequence. Peak  
559 fractions were pooled and concentrated at 4 °C to 56.8  $\mu$ M (10 mg/mL). Concentrated protein  
560 was supplemented with 25  $\mu$ M E7820, and crystallization plates were dispensed as sitting drop  
561 with the Formulatrix NT8 at room temperature. Crystals appeared within one day and continued

562 growing until day 4 when concentrated protein was mixed 2:1 or 1:1 with reservoir containing  
563 200 mM lithium citrate tribasic and 20% (w/v) PEG 3,350 in 96 well, 3 seat vapor diffusion  
564 Intelli-Plates (Art Robbins Instruments). For indisulam and tasisulam crystals, the same aliquots  
565 of Strep II Avi-DCAF15<sub>NTD</sub> (residues 30-264)-Strep II Avi-DCAF15<sub>CTD</sub> (residues 383-600)-  
566 His<sub>6</sub>-DDB1ΔB-His<sub>6</sub>-DDA1-His<sub>6</sub>-RBM39<sub>RRM2</sub> complex bound to E7820 were thawed and  
567 diluted/concentrated two times with buffer containing 20 μM indisulam or 30 μM tasisulam,  
568 respectively. The first dilution was with 5-fold excess of gel filtration buffer containing the  
569 appropriate compound, and the second dilution was with 15-fold excess gel filtration buffer and  
570 compound. During the second dilution step, the protein complex was incubated on ice for 1 hour  
571 to allow complete exchange of the compound prior to concentration. After the second  
572 concentration step, protein complexes were injected onto a Superdex 200 10/300 column  
573 equilibrated with 50 mM HEPES pH 8.0, 150 mM NaCl, 2 mM TCEP and either 20 μM  
574 indisulam or 30 μM tasisulam. After gel filtration, purified protein was processed identically to  
575 E7820-bound complexes, as described above.

576 Crystals were cryo-protected in reservoir solution supplemented with 20% glycerol and  
577 flash frozen in liquid nitrogen. Diffraction data were collected at the APS Chicago (beamline 24-  
578 ID-C) with a Pilatus 6M-F detector at a temperature of 100 K, at wavelength of 0.9792 Å or  
579 1.6531 Å. Data were indexed and integrated using XDS<sup>30</sup> and scaled using AIMLESS supported  
580 by other programs of the CCP4 suite<sup>31</sup>. Data processing statistics, refinement statistics and model  
581 quality parameters are provided in **Supplementary Table 2**.

582

### 583 **Structure determination and model building**

584 The DDB1ΔB-DCAF15<sub>split</sub>-DDA1-E7820-RBM39<sub>RRM2</sub>, DDB1ΔB-DCAF15<sub>split</sub>-DDA1-

585 compound **5** (Iodide-E7820)-RBM39<sub>RRM2</sub>, DDB1ΔB-DCAF15<sub>split</sub>-DDA1-indisulam-  
586 RBM39<sub>RRM2</sub>, and DDB1ΔB-DCAF15<sub>split</sub>-DDA1-tasisulam-RBM39<sub>RRM2</sub> complexes all  
587 crystallized in space group  $P2_12_12_1$  with a single complex in the unit cell. PHASER<sup>32</sup> was used  
588 to determine the structures by molecular replacement using a crystallographic model of  
589 DDB1ΔB based on a crystal structure pdb: 5fqd. Diffraction data for complexes containing  
590 E7820-I or tasisulam were collected at 7500 eV and the MR-SAD pipeline as implemented in  
591 phaser<sup>32</sup> used to obtain additional phase information, followed by density modification using  
592 parrot<sup>31</sup>. The initial model was iteratively improved with COOT<sup>33</sup>, using information from the  
593 density modified maps and sulfur anomalous difference peaks, and refined using  
594 PHENIX.REFINE<sup>34</sup> and autoBUSTER<sup>35</sup> with ligand restraints generated by Grade server  
595 (Global Phasing) or phenix.elbow<sup>34</sup>. Figures were generated with PyMOL (The PyMOL  
596 Molecular Graphics System, Version 2.3.0 Schrödinger, LLC) and model quality was assessed  
597 with MOLPROBITY. Interaction surfaces were determined with PISA , and conservation  
598 mapped using consurf<sup>36</sup>.

599

## 600 **Sample preparation and cryo-EM data collection**

601 The DDB1-DCAF15-E7820-RBM39<sub>RRM2</sub> complex was purified by gel filtration on a  
602 Superdex S200 10/300 column. A single peak fraction was collected and diluted to ~0.075  
603 mg/mL. This diluted fraction was applied (4 μL) to a glow-discharged 1.2/1.3 Quantifoil copper  
604 300 mesh grid, blotted for 3 seconds, and vitrified in liquid ethane with the Leica EM-GP  
605 blotting system. Micrographs were collected on a FEI Titan Krios at 300 kV, equipped with a K2  
606 Summit camera and GIF energy filter. 1,457 micrographs were collected at the National Cryo-  
607 Electron Microscopy Facility (NCI) in super resolution mode at a pixel size of 0.532 Å. Each

608 micrograph was recorded at a total dose of  $40 \text{ e}^-/\text{\AA}^2$  over 40 frames at a defocus range of 1.5-3.0  
609  $\mu\text{m}$ .

610 The DDB1 $\Delta$ B-DCAF15-DDA1-E7820-RBM39<sub>RRM2</sub> complex was purified by gel  
611 filtration, and peak fractions were pooled and concentrated for BS3 crosslinking. Briefly, 5  $\mu\text{M}$   
612 of complex was incubated with 60-fold molar excess of BS3 for 30 minutes at room temperature,  
613 quenched with 50 mM Tris-HCl pH 8.0, and re-injected on a Superdex 200 10/300. A peak  
614 fraction of crosslinked protein at  $\sim 0.048 \text{ mg/mL}$  was applied (4  $\mu\text{L}$ ) to a glow-discharged 1.2/1.3  
615 Quantifoil copper 300 mesh grid, blotted for 3 seconds, and vitrified in liquid ethane with the  
616 Lecia EM-GP blotting system. Data was collected from 2 grids over 4 imaging sessions on the  
617 same FEI Titan Krios at the UMass Cryo-EM facility, operating at 300 kV and equipped with a  
618 K2 Summit camera and GIF energy filter. The Volta phase plate (VPP) was used during all  
619 imaging sessions for this complex, and the position on the VPP was changed approximately  
620 every 400 micrographs. A total of 9,393 micrographs were collected in super resolution mode at  
621 a pixel size of 0.5294  $\text{\AA}$ . Each micrograph was recorded with a total dose of  $\sim 54 \text{ e}^-/\text{\AA}^2$  over 35 or  
622 40 frames, depending on the session. The defocus range was 0.2-2  $\mu\text{m}$  across all micrographs.

623

## 624 **Image Processing**

625 For the DDB1-DCAF15-E7820-RBM39<sub>RRM2</sub> complex, all processing steps were  
626 performed in RELION 2. Movie frames were aligned and binned by a factor of 2 yielding a final  
627 pixel size of 1.064  $\text{\AA}$  and averaged with MotionCor2<sup>37</sup>, and CTF parameters were estimated with  
628 CTFFIND4<sup>38</sup>. A set of 1,000 particles were manually picked to generate 2D class averages for  
629 autopicking. Initial 2D classification was used to generate a starting set of 318,187 particles.

630 From this set, two subsequent rounds of 3D classification with 7.5 degree angular sampling  
631 resulted in 68,324 particles for the final refinement, resulting in a reconstruction at 10 Å.

632 For the DDB1ΔB-DCAF15-DDA1-E7820-RBM39<sub>RRM2</sub> complex, movie frames were  
633 aligned and binned by a factor of 2 yielding a final pixel size of 1.059 Å and averaged with  
634 MotionCor2<sup>37</sup> and CTF parameters as well as the estimated phase shift were determined with  
635 CTFFIND4<sup>38</sup>. For the first three imaging sessions, ~5,000 particles were picked from each  
636 session to generate reference-free 2D class averages for automated picking in Relion. For the  
637 fourth session, crYOLO<sup>39</sup> was used to pick particles with a model that was trained on the data.  
638 All subsequent processing steps for all sessions were performed with Relion 3.0<sup>40</sup>. Initial 2D  
639 classification was used to clean the data from each session independently, after which particles  
640 were pooled for further 3D classification. A round of 3D classification at 7.5 degree sampling  
641 was used to remove additional bad particles from the dataset, after which a set of 923,678  
642 particles were used for CTF refinement and Bayesian polishing<sup>40</sup>. An initial round of CTF  
643 refinement on a consensus 3D refinement from all particles was performed to fit per-particle  
644 defocus. Thereafter, Bayesian polishing was performed independently on particles from each  
645 session. Particle images were then combined again, and it was found that an additional round of  
646 CTF refinement to estimate per-particle defocus led to an improved consensus 3D refinement.  
647 With the polished particles, one round of 3D classification with coarse (7.5 degree) angular  
648 sampling resulted in two main classes, one of which resulted in a reconstruction at 4.5 Å. The  
649 particles from this consensus refinement were further classified without image alignment,  
650 leading to a major class with 53% of the particles. 3D refinement of these particles improved the  
651 map quality, with a resolution of 4.5 Å. Finally, signal subtraction was performed on this  
652 consensus refinement with a soft subtraction mask around the DCAF15 CTD. An additional

653 round of masked 3D classification without image alignment and a T value of 12, to account for  
654 the reduced signal in the particle box, again led to a dominant class with 56% of the particles. A  
655 final refinement with unsubtracted particles (75,529 particles in total) resulted in the final  
656 reconstruction at 4.4 Å. Local resolution was estimated using Relion.

657

### 658 **Cryo-EM model building**

659 The refined and sharpened map from Relion<sup>40</sup> was converted to structure factors using  
660 phenix map to structure factors<sup>34</sup>. DDB1ΔB was placed using phenix dock in map, and the  
661 balbes-molrep pipeline<sup>19</sup> used to place RBM39<sub>RRM2</sub>. The structure of the N-terminal region of  
662 DDA1 in complex with DDB1<sup>24</sup> was used to trace DDA1. An approximate, partial poly-Ala  
663 model of DCAF15 was built in Coot<sup>33</sup>. First, well defined α-helices in the DCAF15 density were  
664 assigned based on secondary structure prediction, and mutations introduced to break helical fold  
665 or interactions (e.g. V43E and I45E in the putative helix-loop-helix motif anchoring DCAF15 to  
666 DDB1) and therefore further validate assignment. The remaining density was traced assisted by  
667 secondary structure predictions and distant constraints obtained through crosslinking mass  
668 spectrometry. Models were refined using phenix realspace refine<sup>34</sup>. To cross validate cryo-EM  
669 and X-ray structures, the final model obtained from the crystal structure was fitted into the cryo-  
670 EM volume using phenix dock in map, and subsequently realspace refined using phenix  
671 realspace refinement.

672

### 673 **Mutant DCAF15 pulldown**

674 High five insect cells were infected with 1.5% (v/v) baculovirus expressing His<sub>6</sub>-  
675 DDB1ΔB, His<sub>6</sub>-RBM39<sub>RRM2</sub>, and wild type or mutant STREP II-DCAF15 full-length. After 40

676 hours, 1.5 mL of 50 mM Tris pH 8.0, 200 mM NaCl, 0.1% Triton X-100, 1 mM PMSF, 10  $\mu$ M  
677 E7820, 2 mM TCEP and 1x protease cocktail (Sigma) was added to cell pellets and further lysed  
678 by sonication. Clarified lysates were then incubated with 50-100  $\mu$ L of STREP-tactin XT  
679 superflow slurry (IBA), rocking at 4°C for one hour. Protein bound to STREP resin was washed  
680 3x with 1 mL of lysis buffer and eluted with 2x packed bead volume of lysis buffer + 50 mM  
681 biotin. Eluted proteins were analyzed by SDS-PAGE.

682

### 683 **BS3, DSBU, DSSO cross-linking and MS**

684 Recombinant DDB1-DCAF15-DDA1-E7820-RBM39<sub>RRM2</sub> and DDB1 $\Delta$ B-DCAF15-  
685 DDA1 were analyzed by the amine-reactive crosslinker DSSO and DSBU, while the DDB1-  
686 DCAF15-DDA1-E7820-RBM39<sub>RRM2</sub> complex was also analyzed by BS3 crosslinking. For BS3  
687 crosslinking, the protein complex was first injected onto a Superdex 200 10/300 and peak  
688 fractions were collected and concentrated to 1 mg/mL (4.6  $\mu$ M) and 10 mM BS3 was added at  
689 20, 40, 60, or 80x molar excess. Crosslinking reactions were incubated for 30 minutes at room  
690 temperature, followed by 5 minutes quench with 50 mM Tris-HCl pH 8.0. Similarly for DSSO  
691 and DSBU crosslinking, protein complexes were first injected onto a Superdex 200 10/300, peak  
692 fractions collected and concentrated to 10  $\mu$ M. 50 mM of DSSO or DSBU was added at a 50,  
693 100, or 200 molar excess. Crosslinking reactions were incubated for 30 minutes at room  
694 temperature, followed by 5 minutes quench with 20 mM Tris-HCl pH 8.0. All crosslinked  
695 samples were precipitated with trichloroacetic acid (TCA) following standard protocols<sup>41</sup>.  
696 Precipitated protein was then dissolved in 10  $\mu$ L of 0.5 M Tris-HCl pH 8.6, 6 M guanidinium-  
697 hydrochloride and reduced, alkylated, and digested with either 200 ng trypsin or 600 ng

698 chymotrypsin following standard protocols<sup>42</sup>. The digests were acidified with formic acid  
699 (ThermoFisher Scientific) and desalted using SOLA $\mu$ <sup>TM</sup> SPE Plates (ThermoFisher Scientific).  
700 Data were collected using an Orbitrap Fusion Lumos mass spectrometer (ThermoFisher  
701 Scientific, San Jose CA, USA) coupled with a Proxeon EASY-nLC 1200 LC pump  
702 (ThermoFisher Scientific). Peptides were separated on an EasySpray ES803 75  $\mu$ m inner  
703 diameter microcapillary column (ThermoFisher Scientific). DSSO crosslinked peptides were  
704 separated using a 100 min gradient of 6–41% acetonitrile in 1.0% formic acid with a flow rate of  
705 350 nL/min. The data were acquired using a mass range of  $m/z$  375 – 1500, resolution 60,000,  
706 AGC target  $4 \times 10^5$ , maximum injection time 50 ms, dynamic exclusion of 30 seconds for the  
707 peptide measurements in the Orbitrap. Data dependent MS2 spectra were acquired in the  
708 Orbitrap with a normalized collision energy (NCE) set at 25%, AGC target set to  $5 \times 10^4$  and a  
709 maximum injection time of 100 ms. For HCD-MS, MS2 fragment ions with a mass difference of  
710 31.9721 Da (DSSO) or 26.0000 Da (DSBU) with 10-100% precursor intensity range were  
711 selected for fragmentation with HCD collision energy set to 30% and scans acquired in the Ion  
712 Trap with AGC target set to  $2 \times 10^4$ , maximum injection time of 150 ms.

713

#### 714 **Chemical crosslinking LC-MS data analysis.**

715 Proteome Discoverer 2.2 (ThermoFisher Scientific) with XLinkX version 2.2 was used  
716 for .RAW file processing and controlling peptide and protein level false discovery rates,  
717 assembling proteins from peptides, and protein quantification from peptides. MS/MS spectra  
718 were searched against a truncated (~200 proteins including the sequences for DCAF15, DDB1  
719 and DDA1) Uniprot human database (September 2016) with both the forward and reverse  
720 sequences. Database search criteria are as follows: tryptic or chymotryptic with two missed



721 cleavages, a precursor mass tolerance of 10 ppm, fragment ion mass tolerance of 0.6 Da, static  
722 alkylation of cysteine (57.0211 Da), variable oxidation of methionine (15.9951 Da), variable  
723 phosphorylation of serine, threonine and tyrosine (79.966 Da). DSSO crosslinked samples  
724 included the following variable modifications of lysines: DSSO (158.004 Da), amidated DSSO  
725 (142.050 Da) and hydrolysed DSSO (176.014 Da), and DSBU crosslinked samples included the  
726 following variable modifications of lysines: DSBU (196.085 Da), amidated DSBU (213.111 Da)  
727 and hydrolysed DSBU (214.095 Da).

728

### 729 **UV-crosslinking-coupled mass spectrometry**

730 Purified DDB1 $\Delta$ B-DCAF15 full-length (3  $\mu$ M) and His<sub>6</sub>-RBM39<sub>RRM2</sub> (6  $\mu$ M), and  
731 DMSO or E7820 (100  $\mu$ M) were mixed and incubated for 15 min on ice. Compound **6**  
732 (Diazirine-E7820, 20  $\mu$ M) or DMSO was added and incubated for 15 min on ice. The pre-mixed  
733 samples were irradiated with long-wave UV light for 15 min using a Spectrolinker UV  
734 Crosslinker (model XL1000, Spectronics Corp., Westbury, NY). The irradiated samples were  
735 processed as described above.

736 Data were collected using an Orbitrap Fusion Lumos mass spectrometer coupled with a  
737 Proxeon EASY-nLC 1200 LC pump. Peptides were separated on an EasySpray ES803 75  $\mu$ m  
738 inner diameter microcapillary column. Peptides were separated using a 100 min gradient of 6–  
739 38% acetonitrile in 1.0% formic acid with a flow rate of 350 nL/min. The data were acquired  
740 using a mass range of  $m/z$  200 – 2000, resolution 120,000, AGC target  $4 \times 10^5$ , maximum  
741 injection time 500 ms, dynamic exclusion of 60 seconds for the peptide measurements in the  
742 Orbitrap. Data dependent MS<sup>2</sup> spectra were acquired in the ion trap with a normalized collision  
743 energy (NCE) set at 27%, AGC target set to  $5 \times 10^4$  and a maximum injection time of 100 ms.

744 Proteome Discoverer 2.2 was used to analyse the LC-MS data. MS/MS spectra were  
745 searched against a truncated (~200 proteins) Uniprot human database (September 2016) with  
746 both the forward and reverse sequences. Database search criteria are as follows: tryptic or  
747 chymotryptic with two missed cleavages, a precursor mass tolerance of 10 ppm, fragment ion  
748 mass tolerance of 0.02 Da, static alkylation of cysteine (57.0211 Da), variable oxidation of  
749 methionine (15.9951 Da), variable phosphorylation of serine, threonine and tyrosine (79.966 Da)  
750 and variable acetylation (42.011 Da) of the protein N-terminus and variable crosslinked  
751 compound **6** (possible adduct sizes: 422.141 Da or 83.049 Da) on all amino acids. Unique  
752 peptides were quantified in PD2.2 and the abundances of compound **6** modified peptides on  
753 DCAF15 for each of the treatments (DMSO, compound **6** (20  $\mu$ M), and compound **6** (20  $\mu$ M) +  
754 E7820 competition (100  $\mu$ M)) were analysed for potential modification sites.

755

### 756 **TMT LC-MS3 mass spectrometry**

757 Kelly cells were treated with DMSO vehicle (triplicate) or 10  $\mu$ M of E7820 in singlicate  
758 for 5h. Treated Kelly cells were washed in PBS (Corning VWR, Radnor PA, USA) and collected  
759 at 3000 g centrifugation. Sample preparation and LC-MS analysis for whole proteome  
760 identification of novel E7820-dependent substrates was performed as described previously<sup>9</sup>.

761

762 **Data and materials availability:** Structural coordinates for DDB1 $\Delta$ B-DDA1-DCAF15-E7820-  
763 RBM39, DDB1 $\Delta$ B-DDA1-DCAF15-tasisulam-RBM39, and DDB1 $\Delta$ B-DDA1-DCAF15-  
764 indisulam-RBM39 have been deposited in the Protein Data Bank under accession numbers  
765 6Q0R, 6Q0V, and 6Q0W. The cryo-EM volume data are available at the EMDB, accession  
766 numbers: EMD-20554 and EMD-20553. Mass spectrometry raw data files have been deposited

767 in PRIDE Archive under the accession numbers: PXD014536. Other data and materials are  
768 available from the authors upon reasonable request.

769  
770 **Methods-only References**

- 771
- 772 29 Abdulrahman, W. *et al.* A set of baculovirus transfer vectors for screening of affinity tags  
773 and parallel expression strategies. *Anal Biochem* **385**, 383-385 (2009).
- 774 30 Kabsch, W. Xds. *Acta Crystallogr D Biol Crystallogr* **66**, 125-132,  
775 doi:10.1107/S0907444909047337 (2010).
- 776 31 Winn, M. D. *et al.* Overview of the CCP4 suite and current developments. *Acta*  
777 *crystallographica. Section D, Biological crystallography* **67**, 235-242,  
778 doi:10.1107/S0907444910045749 (2011).
- 779 32 Mccoy, A. *et al.* Phaser crystallographic software. *Journal of Applied Crystallography*  
780 **40**, 658-674 (2007).
- 781 33 Emsley, P. & Cowtan, K. Coot: model-building tools for molecular graphics. *Acta*  
782 *Crystallographica Section D-Biological Crystallography* **60**, 2126-2132 (2004).
- 783 34 Afonine, P. V. *et al.* Towards automated crystallographic structure refinement with  
784 phenix.refine. *Acta Crystallographica Section D* **68**, 352-367,  
785 doi:doi:10.1107/S0907444912001308 (2012).
- 786 35 BUSTER version 2.10.2 v. 2.10.2 (Global Phasing Ltd., Cambridge, United Kingdom,  
787 2011).
- 788 36 Landau, M. *et al.* ConSurf 2005: the projection of evolutionary conservation scores of  
789 residues on protein structures. *Nucleic acids research* **33**, W299-302,  
790 doi:10.1093/nar/gki370 (2005).
- 791 37 Zheng, S. Q. *et al.* MotionCor2: anisotropic correction of beam-induced motion for  
792 improved cryo-electron microscopy. *Nat Methods* **14**, 331-332, doi:10.1038/nmeth.4193  
793 (2017).
- 794 38 Rohou, A. & Grigorieff, N. CTFFIND4: Fast and accurate defocus estimation from  
795 electron micrographs. *J Struct Biol* **192**, 216-221, doi:10.1016/j.jsb.2015.08.008 (2015).
- 796 39 Moriya, T. *et al.* High-resolution Single Particle Analysis from Electron Cryo-  
797 microscopy Images Using SPHIRE. *J Vis Exp*, doi:10.3791/55448 (2017).

- 798 40 Zivanov, J. *et al.* New tools for automated high-resolution cryo-EM structure  
799 determination in RELION-3. *Elife* **7**, doi:10.7554/eLife.42166 (2018).
- 800 41 Link, A. J. & LaBaer, J. Trichloroacetic acid (TCA) precipitation of proteins. *Cold*  
801 *Spring Harb Protoc* **2011**, 993-994, doi:10.1101/pdb.prot5651 (2011).
- 802 42 Gundry, R. L. *et al.* Preparation of proteins and peptides for mass spectrometry analysis  
803 in a bottom-up proteomics workflow. *Curr Protoc Mol Biol* **Chapter 10**, Unit10 25,  
804 doi:10.1002/0471142727.mb1025s88 (2009).

805

806

807



**Fig. 1**

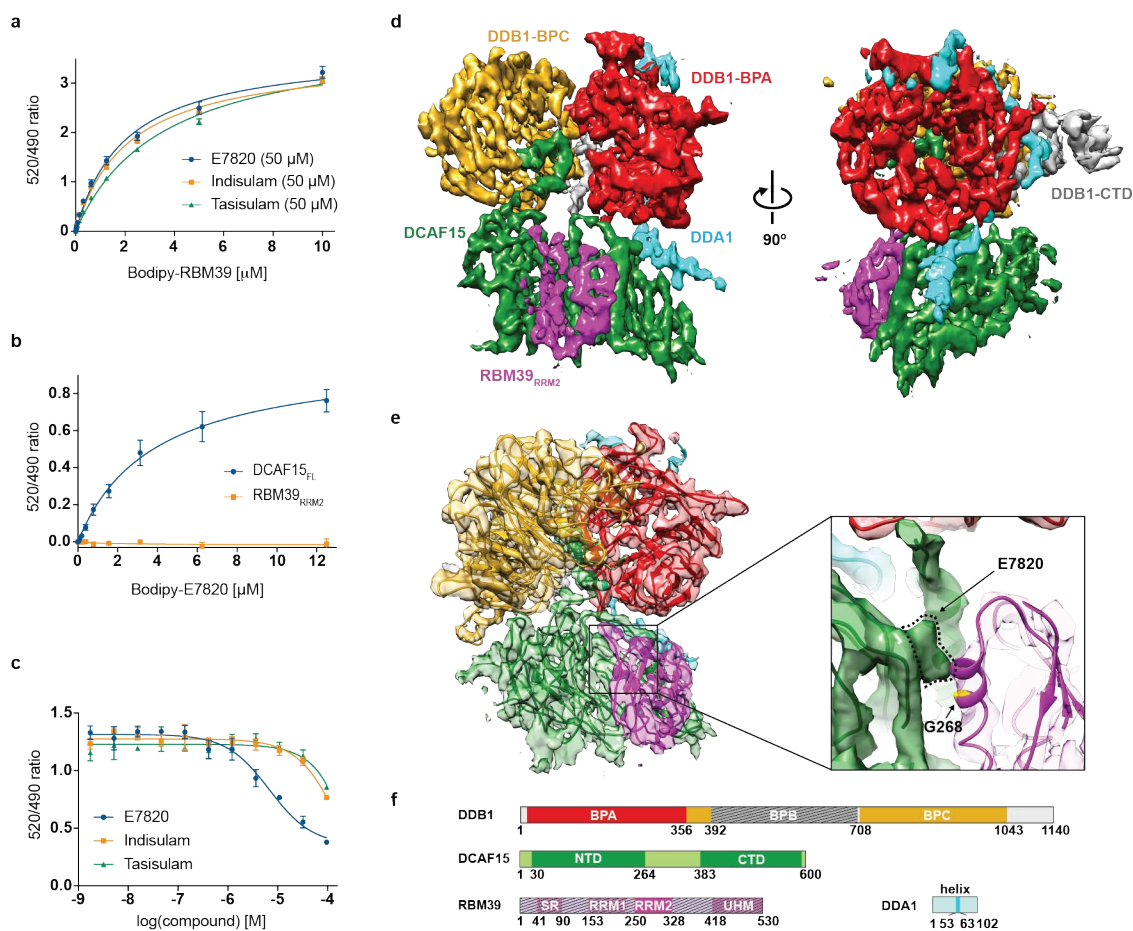

**Fig. 2**

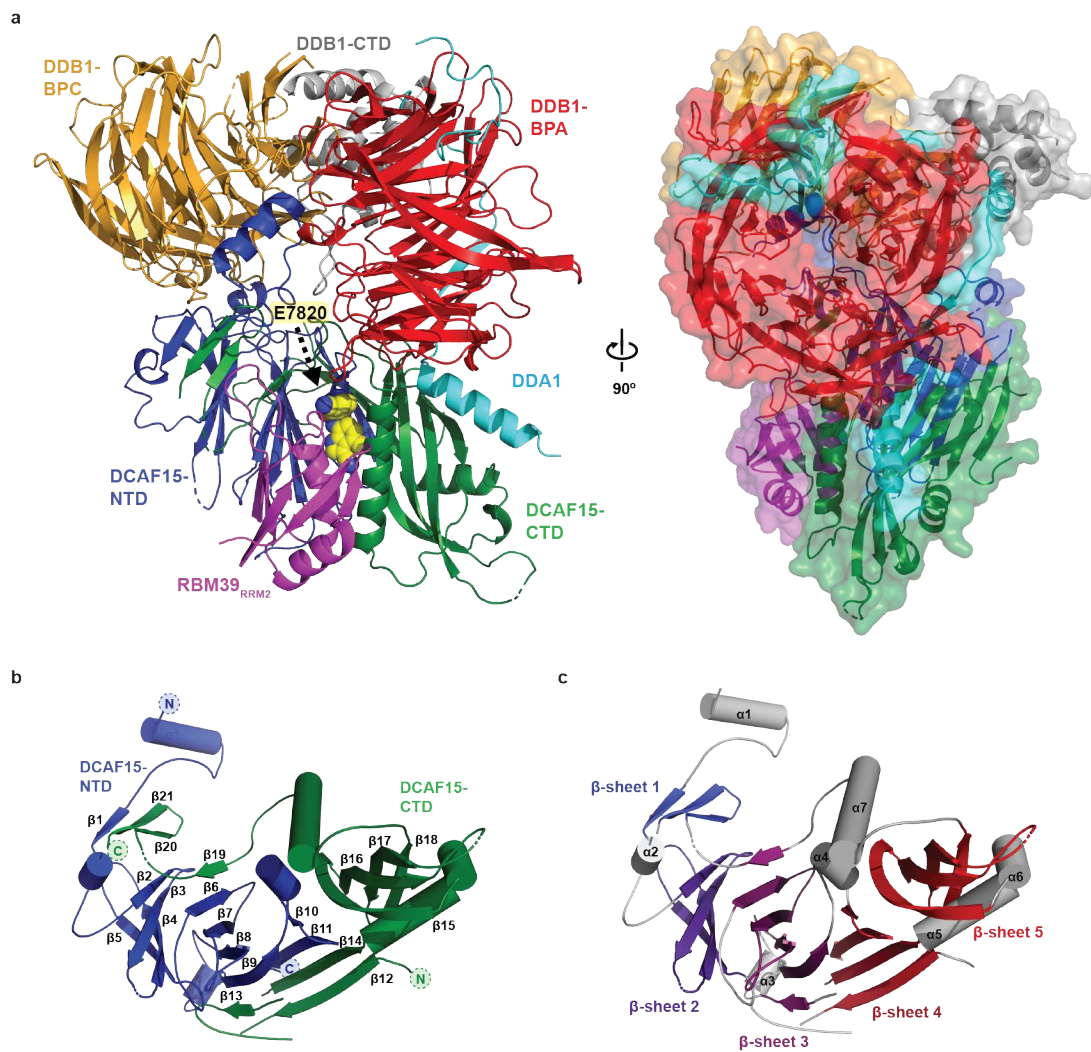



**Fig. 3**

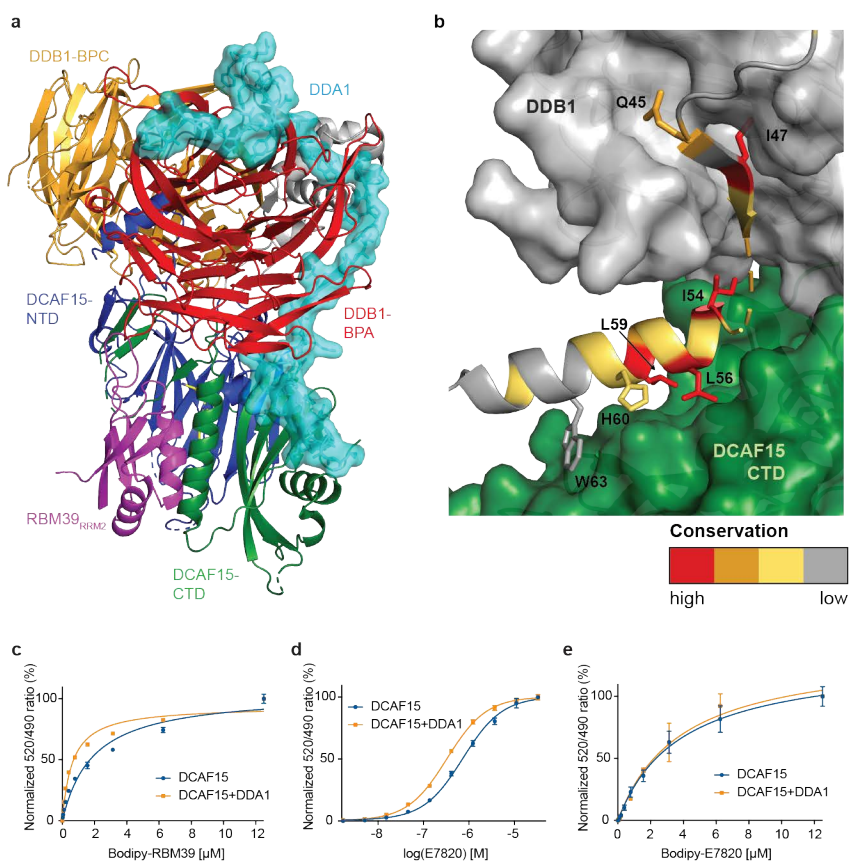



**Fig. 4**

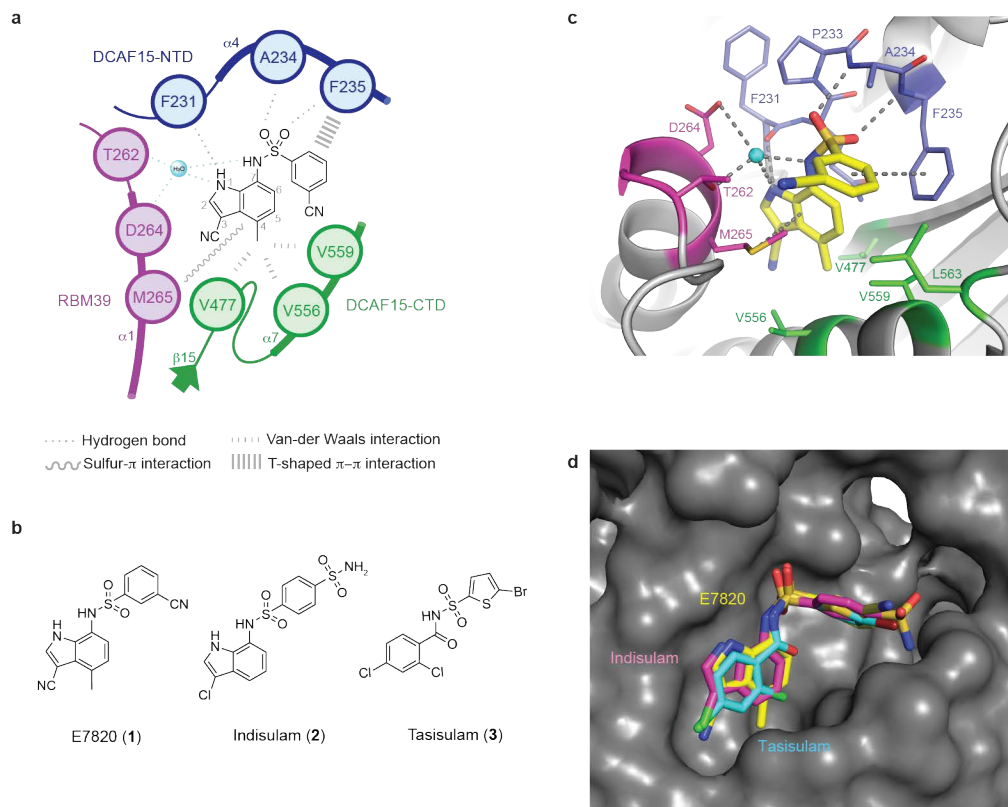

## Figure 5

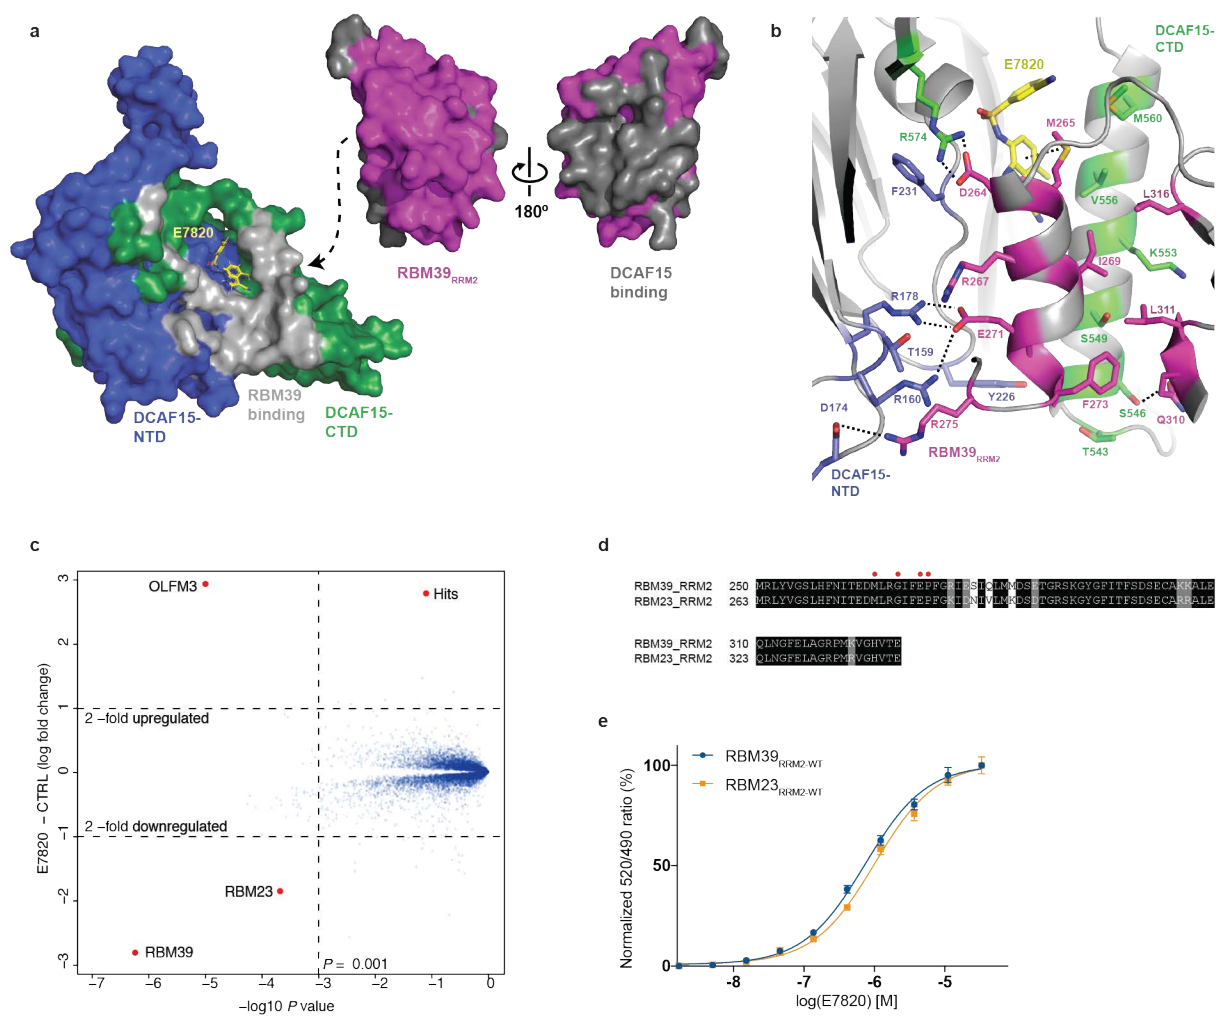

Fig. 6

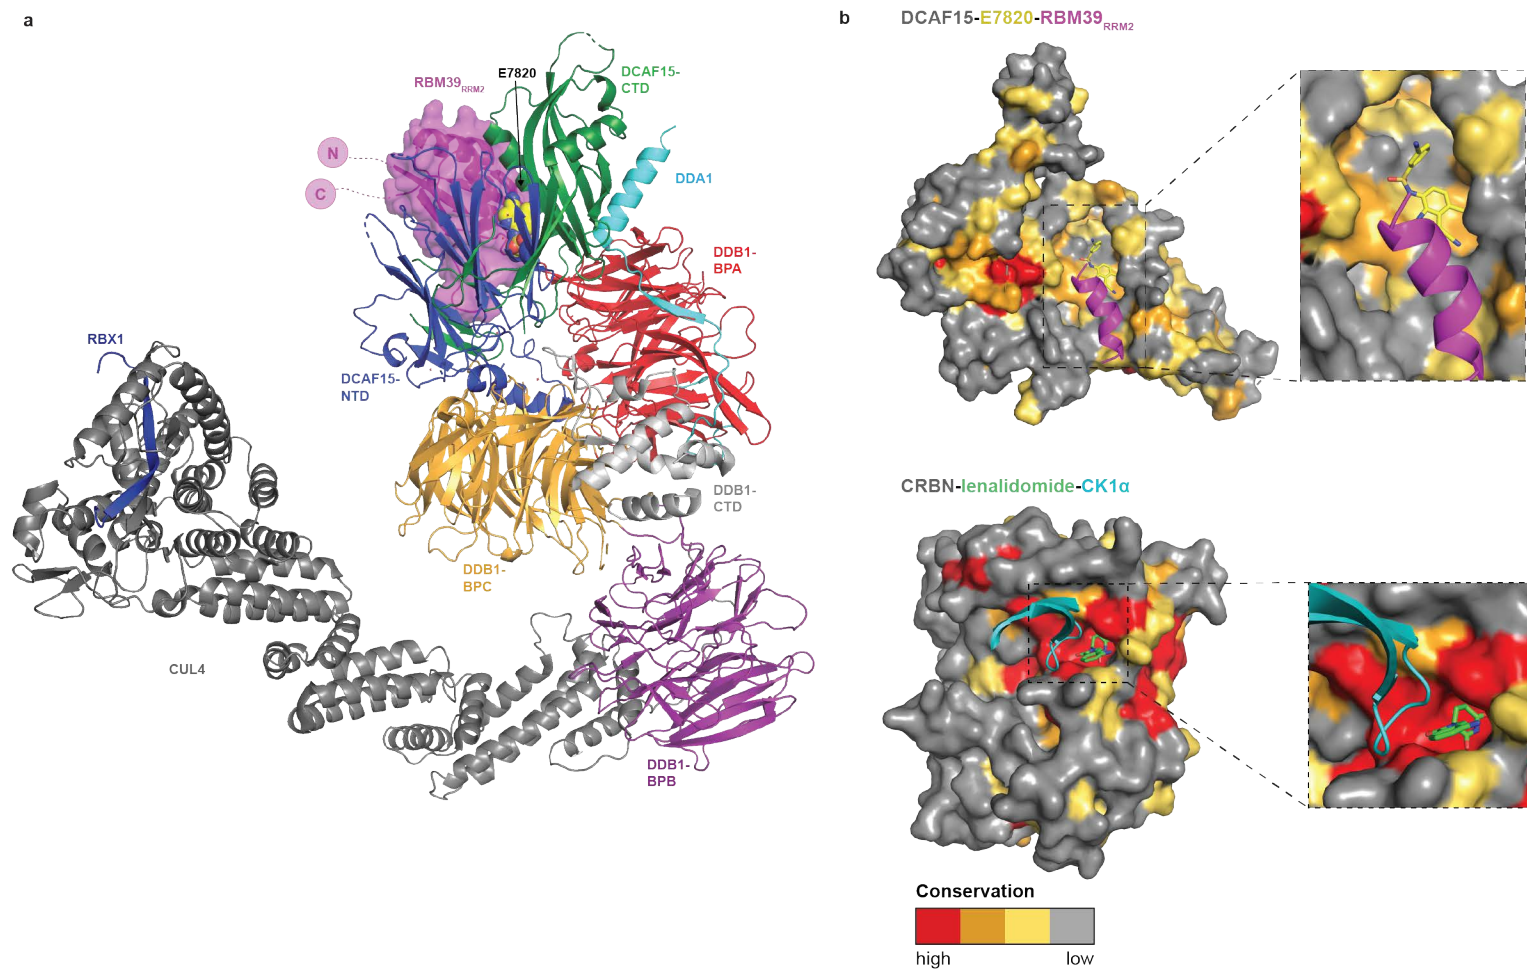

Source: https://www.biorxiv.org/content/10.1101/738534v1.full.pdf
